# Supplementary material for: Synthetic anaplerotic modules for the direct synthesis of complex molecules from CO2
Source: PubMed Central journal article supplement (PMC9889269; doi:10.1038/s41589-022-01179-0), 2022-12-05
Supplement: 41589_2022_1179_MOESM1_ESM.pdf [file 41589_2022_1179_MOESM1_ESM.pdf]

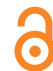

# Synthetic anaplerotic modules for the direct synthesis of complex molecules from CO<sub>2</sub>

In the format provided by the authors and unedited

# Supplementary Information

## Synthetic anaplerotic modules for direct synthesis of complex molecules from CO<sub>2</sub>

Christoph Diehl<sup>1\*</sup>, Patrick D. Gerlinger<sup>1\*</sup>, Nicole Paczia<sup>2</sup>, Tobias J. Erb<sup>1,3#</sup>

<sup>1</sup> Department of Biochemistry & Synthetic Metabolism, Max Planck Institute for Terrestrial Microbiology, Karl-von-Frisch Str. 10, 35043 Marburg, Germany

<sup>2</sup> Core Facility for Metabolomics and Small Molecule Mass Spectrometry, Max Planck Institute for Terrestrial Microbiology, Karl-von-Frisch Str. 10, 35043, Marburg, Germany

<sup>3</sup> SYNMIKRO Center for Synthetic Microbiology, Karl-von-Frisch Str., 14, 35032 Marburg, Germany

\* Equal contribution

# To whom correspondence should be addressed: [toerb@mpi-marburg.mpg.de](mailto:toerb@mpi-marburg.mpg.de)

Supplementary Tables 1-10

Supplementary Figures 1-4

**Supplementary Table 1. Concentrations of enzymes used in the assays.** Setups for modules 4a-d additionally contained all required enzymes from modules 1, 2 and 3. CA – carbonic anhydrase; Ppk – polyphosphate kinase, Cpk – creatinphosphate kinase. \*Wilbur-Anderson unit. \*\*Cell extract. All commercially available enzymes were purchased from Sigma-Aldrich.

| Enzyme | Module 1 |                        | Module 4a |                        | Module 4b |                        | Module 4c |                        | Module 4d |                        | U/mg  | Source     |
|--------|----------|------------------------|-----------|------------------------|-----------|------------------------|-----------|------------------------|-----------|------------------------|-------|------------|
|        | U/ml     | μM                     | U/ml      | μM                     | U/ml      | μM                     | U/ml      | μM                     | U/ml      | μM                     |       |            |
| Pco    | 1        | 3.00                   | 1         | 3.00                   | 1         | 3.00                   | 1         | 3.00                   | 1         | 3.00                   | 12    | 1          |
| Ccr    | 1        | 0.58                   | 1         | 0.58                   | 1         | 0.58                   | 1         | 0.58                   | 1         | 0.58                   | 110   | 1          |
| Epi    | 2.5      | 0.60                   | 2.5       | 0.60                   | 2.5       | 0.60                   | 2.5       | 0.60                   | 2.5       | 0.60                   | 440   | 12         |
| Mcm    | 0.2      | 0.36                   | 0.2       | 0.36                   | 0.2       | 0.36                   | 0.2       | 0.36                   | 0.2       | 0.36                   | 20    | 13         |
| Ser    | 4        | 2.68                   | 4         | 2.68                   | 4         | 2.68                   | 4         | 2.68                   | 4         | 2.68                   | 29    | 14         |
| Ssr    | 0.1      | 0.76                   | 0.1       | 0.76                   | 0.1       | 0.76                   | 0.1       | 0.76                   | 0.1       | 0.76                   | 4     | 1          |
| Hbs    | 0.2      | 5.12                   | 0.2       | 5.12                   | 0.2       | 5.12                   | 0.2       | 5.12                   | 0.2       | 5.12                   | 2     | 15         |
| Gbd    | 0.2      | 0.56                   | 0.2       | 0.56                   | 0.2       | 0.56                   | 0.2       | 0.56                   | 0.2       | 0.56                   | 26    | 15         |
| Ecm    | 0.2      | 0.55                   | 0.2       | 0.55                   | 0.2       | 0.55                   | 0.2       | 0.55                   | 0.2       | 0.55                   | 7     | 12         |
| Mco    | 0.1      | 21.4                   | 0.1       | 21.4                   | 0.1       | 21.4                   | 0.1       | 21.4                   | 0.1       | 21.4                   | 0.1   | 1          |
| Mch    | 5        | 1.26                   | 5         | 1.26                   | 5         | 1.26                   | 5         | 1.26                   | 5         | 1.26                   | 1500  | 16         |
| Mcl    | 0.5      | 13.6                   | 0.5       | 13.6                   | 0.5       | 13.6                   | 0.5       | 13.6                   | 0.5       | 13.6                   | 5     | 17         |
| Cat    | 1.5      | 1.37                   | 1.5       | 1.37                   | 1.5       | 1.37                   | 1.5       | 1.37                   | 1.5       | 1.37                   | 11740 | 18         |
| Fdh    | 0.5      | 14.4                   | 0.5       | 14.4                   | 0.5       | 14.4                   | 0.5       | 14.4                   | 0.5       | 14.4                   | 1     | 19         |
| Cpk    | 4        | 0.39                   | 4         | 0.39                   | 4         | 0.39                   | 4         | 0.39                   | 4         | 0.39                   | 150   | commercial |
| Ppk    | 0.5      | 2                      |           |                        |           |                        |           |                        |           |                        | 12    | 20         |
| CA     | *        | 0.02                   | *         | 0.02                   | *         | 0.02                   | *         | 0.02                   | *         | 0.02                   | *2000 | commercial |
| Gor    | 0.1      | 1.10                   |           |                        |           |                        |           |                        |           |                        | -     | 21         |
| Bha    |          |                        | 0.5       | 2.26                   | 0.5       | 2.26                   | 0.5       | 2.26                   | 0.5       | 2.26                   | 116   | 22         |
| Bhd    |          |                        | 0.5       | 1.37                   | 0.5       | 1.37                   | 0.5       | 1.37                   | 0.5       | 1.37                   | 92    | 22         |
| Isr    |          |                        | 5         | 14.8                   | 5         | 14.8                   | 5         | 14.8                   | 5         | 14.8                   | 358   | 22         |
| Agt    |          |                        | 1.2       | 1.93                   | 1.2       | 1.93                   | 1.2       | 1.93                   | 1.2       | 1.93                   | 77    | 22         |
| Mdh    |          |                        | 7.91      | 1.33                   | 0.79      | 0.13                   | 7.91      | 1.33                   | 7.91      | 1.33                   | 1611  | 23         |
| Mtk    |          |                        |           |                        | 0.5       |                        | 0.5       |                        | 0.5       |                        | 1.5   | This Work  |
| Fum    |          |                        | 0.5       | 0.66                   |           |                        |           |                        |           |                        | 340   | 24         |
| Frd    |          |                        | 0.01      | 1.05                   |           |                        |           |                        |           |                        | 0.007 | 5          |
| Ses    |          |                        | 0.5       | 1.00                   | 0.5       | 1.00                   |           |                        |           |                        | 19    | 25         |
| Cit    |          |                        |           |                        | 0.5       | 8.98                   |           |                        |           |                        | 4     | 26         |
| Acn    |          |                        |           |                        | 0.5       | 15.88                  |           |                        |           |                        | 6     | 27         |
| Icl    |          |                        |           |                        | 5         | 12.54                  |           |                        |           |                        | 38    | 28         |
| Pcc*   |          |                        |           |                        |           |                        | 0.1       | 7.69                   |           |                        | 1     | 29         |
| Mcr    |          |                        |           |                        |           |                        | 0.5       | 0.28                   |           |                        | 10    | 7          |
| Pcs    |          |                        |           |                        |           |                        | 0.1       | 3.09                   |           |                        | 1     | 30         |
| Adk    |          |                        |           |                        |           |                        | 15        | 0.18                   |           |                        | 1247  | 31         |
| Aat    |          |                        |           |                        |           |                        |           |                        | 0.5       | 17.74                  | 5     | 32         |
| Aar    |          |                        |           |                        |           |                        |           |                        | 0.5       | 28.27                  | **0.6 | 33         |
| Bbd    |          |                        |           |                        |           |                        |           |                        | 0.5       | 52.47                  | 965   | This work  |
| DEBS   |          | (2)<br>each<br>protein |           | (2)<br>each<br>protein |           | (2)<br>each<br>protein |           | (2)<br>each<br>protein |           | (2)<br>each<br>protein |       | -          |

**Supplementary Table 2. Yield comparison of the different modules.** mm-CoA: methylmalonyl-CoA. Carbons/mm-CoA and Total carbons in product are calculated for the methylmalonyl backbone (C4). Note that all setups include modules 1-3. \* calculations include the carbon lost through decarboxylative condensation.

|      | Substrate (glyoxylate) [ $\mu$ M] | Initial carbon concentration [ $\mu$ M] |  | Product mm-CoA [ $\mu$ M] | Carbon per mm-CoA  | Total carbon concentration from product [ $\mu$ M] | Yield [%] |
|------|-----------------------------------|-----------------------------------------|--|---------------------------|--------------------|----------------------------------------------------|-----------|
| 4a   | 250                               | 500                                     |  | 130                       | 4                  | 520                                                | 104       |
| 4b   | 250                               | 500                                     |  | 110                       | 4                  | 441                                                | 88        |
| 4c   | 250                               | 500                                     |  | 498                       | 4                  | 1992                                               | 398       |
| 4d   | 250                               | 500                                     |  | 69                        | 4                  | 276                                                | 55        |
|      |                                   |                                         |  | Product 6-dEB [ $\mu$ M]  | Carbons per 6-dEB* |                                                    |           |
| 4a+5 | 250                               | 500                                     |  | 6                         | 27                 | 163                                                | 42        |
| 4b+5 | 250                               | 500                                     |  | 2.8                       | 27                 | 76                                                 | 15        |
| 4c+5 | 250                               | 500                                     |  | 31.9                      | 27                 | 863                                                | 173       |
| 4d+5 | 250                               | 500                                     |  | 0                         | 27                 | 0                                                  | 0         |

**Supplementary Table 3. List of all pathway enzymes used in this work.** Note that auxiliary enzymes are listed in Table S1.

| #  | Name | Full name                                 | Catalyzed reaction                                                                                      | Origin                  | Comment                                          | Source |
|----|------|-------------------------------------------|---------------------------------------------------------------------------------------------------------|-------------------------|--------------------------------------------------|--------|
| 1  | Ccr  | crotonyl-CoA carboxylase/reductase        | Crotonyl-CoA + NADPH + CO <sub>2</sub> $\rightleftharpoons$ Ethylmalonyl-CoA + NADP <sup>+</sup>        | <i>M. extorquens</i>    |                                                  | 1      |
| 2  | Epi  | methylmalonyl-/ethylmalonyl-CoA epimerase | (2S)-Ethylmalonyl-CoA $\rightleftharpoons$ (2R)-Ethylmalonyl-CoA                                        | <i>R. sphaeroides</i>   |                                                  | 1      |
|    | Ecm  | ethylmalonyl-CoA mutase                   | (2R)-Ethylmalonyl-CoA $\rightleftharpoons$ Methylsuccinyl-CoA                                           | <i>R. sphaeroides</i>   |                                                  | 1      |
| 3  | Mco  | methylsuccinyl-CoA oxidase                | Methylsuccinyl-CoA + O <sub>2</sub> $\rightleftharpoons$ Mesoacetyl-CoA + H <sub>2</sub> O <sub>2</sub> | <i>R. sphaeroides</i>   |                                                  | 1      |
| 4  | Mch  | mesoacetyl-CoA hydratase                  | Mesoacetyl-CoA + H <sub>2</sub> O(l) $\rightleftharpoons$ beta-Methylmalyl-CoA                          | <i>R. sphaeroides</i>   |                                                  | 1      |
| 5  | Mcl  | $\beta$ -methylmalyl-CoA lyase            | beta-Methylmalyl-CoA $\rightleftharpoons$ Glyoxylate + Propionyl-CoA                                    | <i>R. sphaeroides</i>   |                                                  | 1      |
| 6  | Pco  | propionyl-CoA oxidase                     | Propionyl-CoA + O <sub>2</sub> $\rightleftharpoons$ Acrylyl-CoA + H <sub>2</sub> O <sub>2</sub>         | <i>A. thaliana</i>      | A. thaliana short chain acyl-CoA oxidase 4 T134L | 1      |
| 7  | Ccr  | Crotonyl-CoA carboxylase/reductase        | Acrylyl-CoA + NADPH + CO <sub>2</sub> $\rightleftharpoons$ Methylmalonyl-CoA + NADP <sup>+</sup>        | <i>M. extorquens</i>    |                                                  | 1      |
| 8  | Epi  | methylmalonyl-/ethylmalonyl-CoA epimerase | (2S)-Ethylmalonyl-CoA $\rightleftharpoons$ (2R)-Ethylmalonyl-CoA                                        | <i>R. sphaeroides</i>   |                                                  | 1      |
|    | Mcm  | methylmalonyl-CoA mutase                  | Methylmalonyl-CoA $\rightleftharpoons$ Succinyl-CoA                                                     | <i>R. sphaeroides</i>   |                                                  | 1      |
| 9  | Scr  | succinyl-CoA reductase                    | Succinyl-CoA + NADPH $\rightleftharpoons$ Succinic semialdehyde + NADP <sup>+</sup> + CoA               | <i>C. kluyveri</i>      |                                                  | 1      |
| 10 | Ssr  | succinic semialdehyde reductase           | Succinic semialdehyde + NADPH $\rightleftharpoons$ 4-Hydroxybutyric acid + NADP <sup>+</sup>            | <i>H. sapiens</i>       |                                                  | 1      |
| 11 | Hbs  | 4-hydroxybutyryl-CoA synthetase           | 4-Hydroxybutyric acid + ATP + CoA $\rightleftharpoons$ 4-Hydroxybutyryl-CoA + ADP + Pi                  | <i>N. maritimus</i>     |                                                  | 1      |
| 12 | Hbd  | 4-hydroxybutyryl-CoA dehydratase          | 4-Hydroxybutyryl-CoA $\rightleftharpoons$ Crotonyl-CoA + H <sub>2</sub> O(l)                            | <i>N. maritimus</i>     |                                                  | 1      |
| 13 | Bha  | $\beta$ -hydroxyaspartate aldolase        | 3-hydroxyaspartate $\rightleftharpoons$ Iminosuccinate + H <sub>2</sub> O                               | <i>P. denitrificans</i> | bhcC                                             | 2      |
| 14 | Bhd  | $\beta$ -hydroxyaspartate dehydratase     | Glyoxylate + Glycine $\rightleftharpoons$ 3-hydroxyaspartate                                            | <i>P. denitrificans</i> | bhcB                                             | 2      |
| 15 | Isr  | imininosuccinate reductase                | Iminosuccinate + NADPH $\rightleftharpoons$ Aspartate + NADP <sup>+</sup>                               | <i>P. denitrificans</i> | bhcD                                             | 2      |
| 16 | Agt  | aspartate-glyoxylate aminotransferase     | Aspartate + Glyoxylate $\rightleftharpoons$ Oxaloacetate + Glycine                                      | <i>P. denitrificans</i> | bhcA                                             | 2      |
| 17 | Mdh  | malate dehydrogenase                      | Oxaloacetate + NADH $\rightleftharpoons$ Malate + NAD <sup>+</sup>                                      | <i>E. coli</i>          |                                                  | 3      |
| 18 | Mtk  | malyl-CoA synthetase                      | Malate + ATP + CoA $\rightleftharpoons$ Malyl-CoA + ADP + Pi                                            | <i>M. extorquens</i>    | mtkAB; subunit beta A, subunit alpha B           | 3      |
| 19 | Mcl  | $\beta$ -methylmalyl-CoA lyase            | Malyl-CoA $\rightleftharpoons$ Glyoxylate + Acetyl-CoA                                                  | <i>R. sphaeroides</i>   |                                                  | 1      |

**Supplementary Table 3 continued**

|    |      |                                 |                                                                                                                                                                |                              |                                               |           |
|----|------|---------------------------------|----------------------------------------------------------------------------------------------------------------------------------------------------------------|------------------------------|-----------------------------------------------|-----------|
| 20 | Fum  | fumarate hydratase              | Malate $\rightleftharpoons$ Fumarate + H <sub>2</sub> O                                                                                                        | <i>E. coli</i>               |                                               | 4         |
| 21 | Frd  | fumarate reductase              | Fumarate + NADH $\rightleftharpoons$ Succinate + NAD <sup>+</sup>                                                                                              | <i>T. brucei</i>             |                                               | 5         |
| 22 | Scs  | succinyl-CoA synthetase         | Succinate + ATP + CoA $\rightleftharpoons$ Succinyl-CoA + ADP + Pi                                                                                             | <i>E. coli</i>               | sucC subunit beta, sucD subunit alpha         | 4         |
| 23 | Cit  | citrate synthase                | Acetyl-CoA + Oxaloacetate + H <sub>2</sub> O(l) $\rightleftharpoons$ Citrate + CoA                                                                             | <i>Synechocystis sp.6803</i> |                                               | This work |
| 24 | Acn  | aconitate hydratase A           | Citrate $\rightleftharpoons$ Isocitrate                                                                                                                        | <i>E. coli</i>               |                                               | 4         |
| 25 | Icl  | isocitrate lyase                | Isocitrate $\rightleftharpoons$ Glyoxylate + Succinate                                                                                                         | <i>E. coli</i>               |                                               | 4         |
| 26 | Pcc* | propionyl-CoA carboxylase       | Acetyl-CoA + HCO <sub>3</sub> <sup>-</sup> + ATP $\rightleftharpoons$ Malonyl-CoA + AMP + PPi                                                                  | <i>M. extorquens</i>         | M. extorquens propionyl-CoA carboxylase D4071 | 6         |
| 27 | Mcr  | malonyl-CoA reductase           | Malonyl-CoA + NADPH $\rightleftharpoons$ Malonate semialdehyde + NADP <sup>+</sup> + CoA                                                                       | <i>C. aurantiacus</i>        |                                               | 7         |
| 28 | Mcr  | malonyl-CoA reductase           | Malonate semialdehyde + NADPH $\rightleftharpoons$ 3-Hydroxypropionate + NADP <sup>+</sup>                                                                     | <i>C. aurantiacus</i>        |                                               | 7         |
| 29 | Pcs  | propionyl-CoA synthase          | 3-Hydroxypropionate + ATP + CoA $\rightleftharpoons$ 3-Hydroxypropionyl-CoA + AMP + PPi                                                                        | <i>Erythrobacter NAP1</i>    |                                               | 8         |
| 30 | Pcs  | propionyl-CoA synthase          | 3-Hydroxypropionyl-CoA $\rightleftharpoons$ Acrylyl-CoA + H <sub>2</sub> O(l)                                                                                  | <i>Erythrobacter NAP1</i>    |                                               | 8         |
| 31 | Pcs  | propionyl-CoA synthase          | Acrylyl-CoA + NADPH $\rightleftharpoons$ Propionyl-CoA + NADP <sup>+</sup>                                                                                     | <i>Erythrobacter NAP1</i>    |                                               | 8         |
| 32 | pha  | acetoacetyl-CoA thiolase        | 2 Acetyl-CoA $\rightleftharpoons$ Acetoacetyl-CoA + CoA                                                                                                        | <i>C. necator</i>            |                                               | 9         |
| 33 | phb  | acetoacetyl-CoA reductase       | Acetoacetyl-CoA + NADPH $\rightleftharpoons$ (S)-3-Hydroxybutyryl-CoA + NADP <sup>+</sup>                                                                      | <i>C. necator</i>            |                                               | 9         |
| 34 | phj  | enoyl-CoA hydratase             | (S)-3-Hydroxybutyryl-CoA $\rightleftharpoons$ Crotonyl-CoA + H <sub>2</sub> O(l)                                                                               | <i>P. aeruginosa</i>         |                                               | 10        |
| 35 | DEBS | 6-deoxyerythronolide B synthase | Propionyl-CoA + 6 NADPH + 6 Methylmalonyl-CoA $\rightleftharpoons$ 6-Deoxyerythronolide B + 6 CO <sub>2</sub> + 7 CoA + 6 NADP <sup>+</sup> + H <sub>2</sub> O | <i>S. erythrea</i>           | summarized reaction sequence                  | 11        |

**Supplementary Table 1. LC-MS gradient for the separation of CoA thioesters.**

| Time [min] | A [%] | B [%] |
|------------|-------|-------|
| 0          | 100   | 0     |
| 2          | 100   | 0     |
| 5          | 94    | 6     |
| 8          | 77    | 23    |
| 10         | 20    | 80    |
| 11         | 20    | 80    |
| 12         | 100   | 0     |
| 12.5       | 100   | 0     |

**Supplementary Table 2. MRM transitions for the quantification of CoA thioesters.**

| Compound                                  | Precursor Ion | Product Ion | Dwell | Fragmentor | Collision Energy | Cell Accelerator Volt. | Polarity |
|-------------------------------------------|---------------|-------------|-------|------------|------------------|------------------------|----------|
| Malyl-CoA (Quantifier)                    | 884.1         | 377.1       | 25    | 380        | 37               | 5                      | Positive |
| Malyl-CoA (Qualifier)                     | 884.1         | 428         | 25    | 380        | 29               | 5                      | Positive |
| Acetyl-CoA (Quantifier)                   | 810.1         | 302.2       | 25    | 380        | 35               | 5                      | Positive |
| Acetyl-CoA (Qualifier)                    | 810.1         | 428         | 25    | 380        | 35               | 5                      | Positive |
| Ethylmalonyl-CoA (Quantifier)             | 882.1         | 331.2       | 25    | 380        | 41               | 5                      | Positive |
| Ethylmalonyl-CoA (Qualifier)              | 882.1         | 428         | 25    | 380        | 29               | 5                      | Positive |
| Methylsuccinyl-CoA (Quantifier)           | 882           | 375.1       | 25    | 380        | 33               | 5                      | Positive |
| Methylsuccinyl-CoA (Qualifier)            | 882           | 428         | 25    | 380        | 29               | 5                      | Positive |
| Mesaconyl-CoA (Quantifier)                | 880.1         | 375.1       | 25    | 380        | 25               | 5                      | Positive |
| Mesaconyl-CoA (Qualifier)                 | 880.1         | 428         | 25    | 380        | 35               | 5                      | Positive |
| Succinyl-CoA (Quantifier)                 | 868.1         | 361.1       | 25    | 380        | 35               | 5                      | Positive |
| Succinyl-CoA (Qualifier)                  | 868.1         | 428.1       | 25    | 380        | 35               | 5                      | Positive |
| Methylmalonyl-CoA (Quantifier)            | 868.1         | 317.1       | 25    | 380        | 41               | 5                      | Positive |
| Methylmalonyl-CoA (Qualifier)             | 868.1         | 428         | 25    | 380        | 31               | 5                      | Positive |
| Malonyl-CoA (Quantifier)                  | 854.1         | 245         | 25    | 380        | 32               | 5                      | Positive |
| Malonyl-CoA (Qualifier)                   | 854.1         | 428         | 25    | 380        | 28               | 5                      | Positive |
| $\gamma$ -hydroxybutyryl-CoA (Quantifier) | 854.1         | 347.1       | 25    | 380        | 37               | 5                      | Positive |
| $\gamma$ -hydroxybutyryl-CoA (Qualifier)  | 854.1         | 428         | 25    | 380        | 30               | 5                      | Positive |
| Crotonyl-CoA (Quantifier)                 | 836.1         | 329         | 25    | 380        | 33               | 5                      | Positive |
| Crotonyl-CoA (Qualifier)                  | 836.1         | 428         | 25    | 380        | 26               | 5                      | Positive |
| Propionyl-CoA (Quantifier)                | 824.1         | 317.1       | 25    | 380        | 31               | 5                      | Positive |
| Propionyl-CoA (Qualifier)                 | 824.1         | 428         | 25    | 380        | 28               | 5                      | Positive |

**Supplementary Table 5 continued.**

|                                 |       |       |    |     |    |   |          |
|---------------------------------|-------|-------|----|-----|----|---|----------|
| Methylsuccinyl-CoA (Quantifier) | 824.1 | 317.1 | 25 | 380 | 31 | 5 | Positive |
| Methylsuccinyl-CoA (Qualifier)  | 824.1 | 428   | 25 | 380 | 28 | 5 | Positive |
| B-methylmalyl-CoA (Quantifier)  | 898.1 | 391.1 | 25 | 380 | 39 | 5 | Positive |
| B-methylmalyl-CoA (Qualifier)   | 898.1 | 428.1 | 25 | 380 | 33 | 5 | Positive |

**Supplementary Table 3. LC-MS gradient for the analysis of glycolate.**

| Time [min] | A [%] | B [%] |
|------------|-------|-------|
| 0          | 100   | 0     |
| 4          | 100   | 0     |
| 6          | 0     | 100   |
| 7          | 0     | 100   |
| 7.1        | 100   | 0     |
| 12         | 100   | 0     |

**Supplementary Table 4. MRM transitions for the quantification of glycolate.**

| Compound                               | Precursor Ion | Product Ion | Dwell | Fragmentor | Collision Energy | Cell Accelerator Volt. | Polarity |
|----------------------------------------|---------------|-------------|-------|------------|------------------|------------------------|----------|
| <sup>12</sup> C-Glycolate (Quantifier) | 75            | 47          | 150   | 380        | 9                | 5                      | Negative |
| <sup>12</sup> C-Glycolate (Qualifier)  | 75            | 75          | 150   | 380        | 0                | 5                      | Negative |
| <sup>13</sup> C-Glycolate (Quantifier) | 77            | 48          | 150   | 380        | 9                | 5                      | Negative |
| <sup>13</sup> C-Glycolate (Qualifier)  | 77            | 77          | 150   | 380        | 0                | 5                      | Negative |

**Supplementary Table 5. LC-MS gradient for the analysis of malate.**

| Time [min] | A [%] | B [%] |
|------------|-------|-------|
| 0.0        | 85    | 15    |
| 7.0        | 0     | 100   |
| 9.0        | 0     | 100   |
| 9.1        | 85    | 15    |
| 15.0       | 85    | 15    |

**Supplementary Table 6. MRM transitions for the quantification of malate.**

| Compound                            | Precursor Ion | Product Ion | Dwell | Fragmentor | Collision Energy | Cell Accelerator Volt. | Polarity |
|-------------------------------------|---------------|-------------|-------|------------|------------------|------------------------|----------|
| <sup>12</sup> C-Malate (Quantifier) | 133           | 115         | 150   | 80         | 11               | 5                      | Negative |
| <sup>12</sup> C-Malate (Qualifier)  | 133           | 133         | 150   | 80         | 0                | 5                      | Negative |
| <sup>13</sup> C-Malate (Quantifier) | 137           | 119         | 150   | 80         | 11               | 5                      | Negative |

**Supplementary Table 7. Analyzed 6-dEB adducts.**

| <b>Adduct</b> | <b>[M+H]<sup>+</sup></b> | <b>[M+Na]<sup>+</sup></b> | <b>[M-H<sub>2</sub>O+H]<sup>+</sup></b> |
|---------------|--------------------------|---------------------------|-----------------------------------------|
| <b>m/z</b>    | 387.274116               | 409.256058                | 369.263551                              |



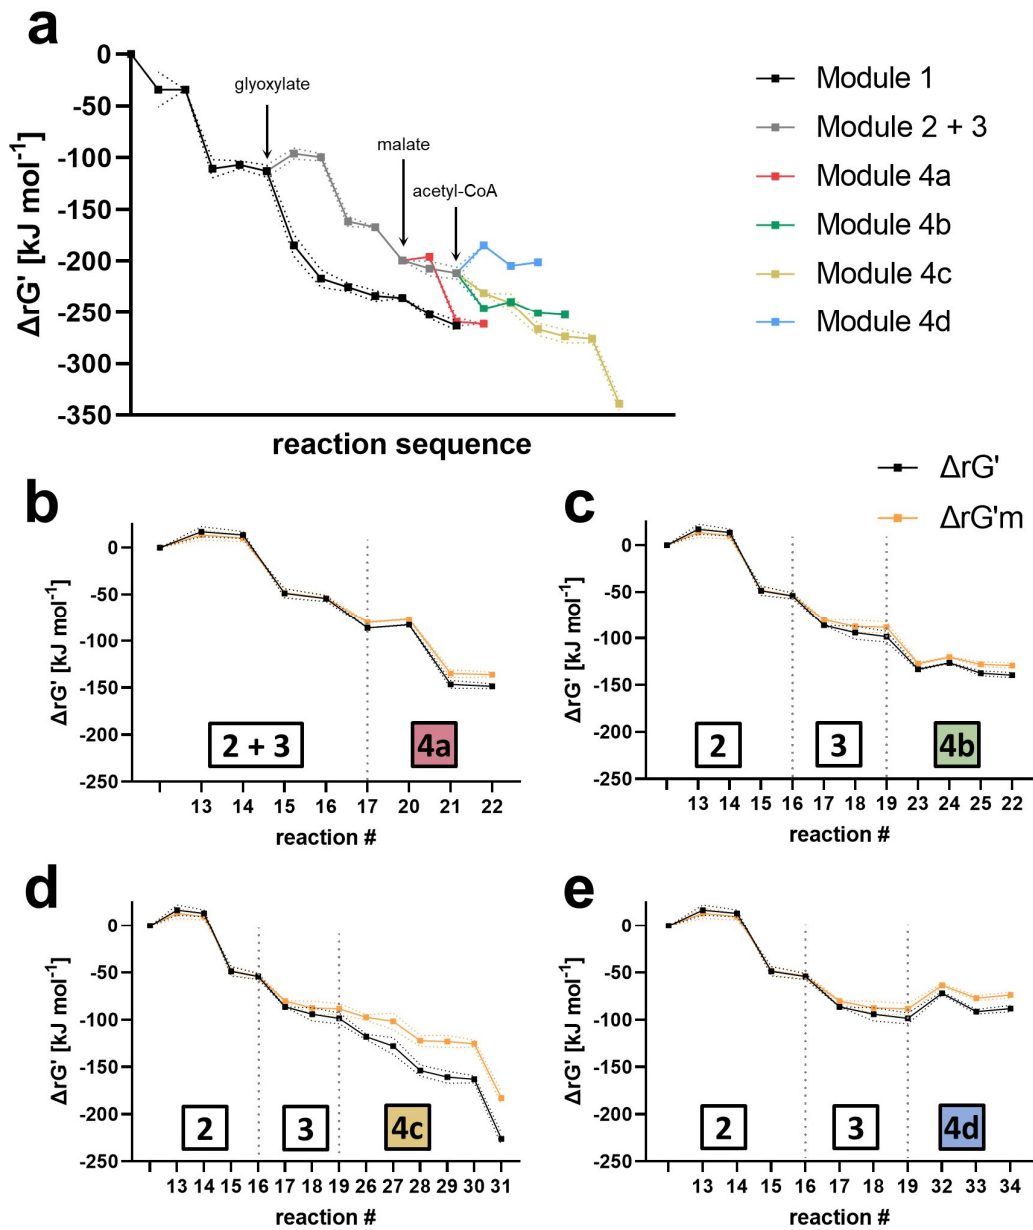

**Supplementary Fig. 1. Analysis of the thermodynamic changes of all reaction modules as Gibbs free energy profile.** Shown are the free energy profiles of modules and module combinations to the respective feedback intermediate. **a** Overview of consecutive reactions, starting with the carboxylation of crotonyl-CoA to ethylmalonyl-CoA (#1). Arrows indicate intermediates that mark branching points into other modules (labeled by color). **b** Modules 2-3-4a, starting from glyoxylate and yielding succinyl-CoA. **c** Modules 2-3-4b, starting from glyoxylate and yielding succinyl-CoA, **d** Modules 2-3-4c, starting from glyoxylate and yielding propionyl-CoA, **e** Module 2-3-4d, starting from glyoxylate and yielding crotonyl-CoA. Grey dashed lines indicate transitions between modules.  $\Delta rG'$  (custom reactant concentrations, see below) and  $\Delta rG'm$  (default concentration of 1 mM for all reactants) values were estimated using the eEquilibrator v3.0 tool<sup>34</sup> at pH 7.5,  $I = 0.25$  and  $pMg = 3$ . All substrate and product (CoA, acids, aldehydes) concentrations were set to 250  $\mu$ M, with the following exceptions: #23 200  $\mu$ M acetyl-CoA and 50  $\mu$ M oxaloacetate, #24-25 all reactants 50  $\mu$ M (and 250  $\mu$ M glyoxylate), #32-34 125 mM acetoacetyl-CoA and every following reactant. Concentrations of other metabolites were set as follows: NAD(P)H = 4.5 mM; NAD(P)<sup>+</sup> = 0.5 mM; ATP = 3 mM; ADP = 1.4 mM; AMP = 0.5 mM; CoA = 1 mM; CO<sub>2</sub>(g) = 3.31 mM; CO<sub>2</sub>(total) = 50 mM.

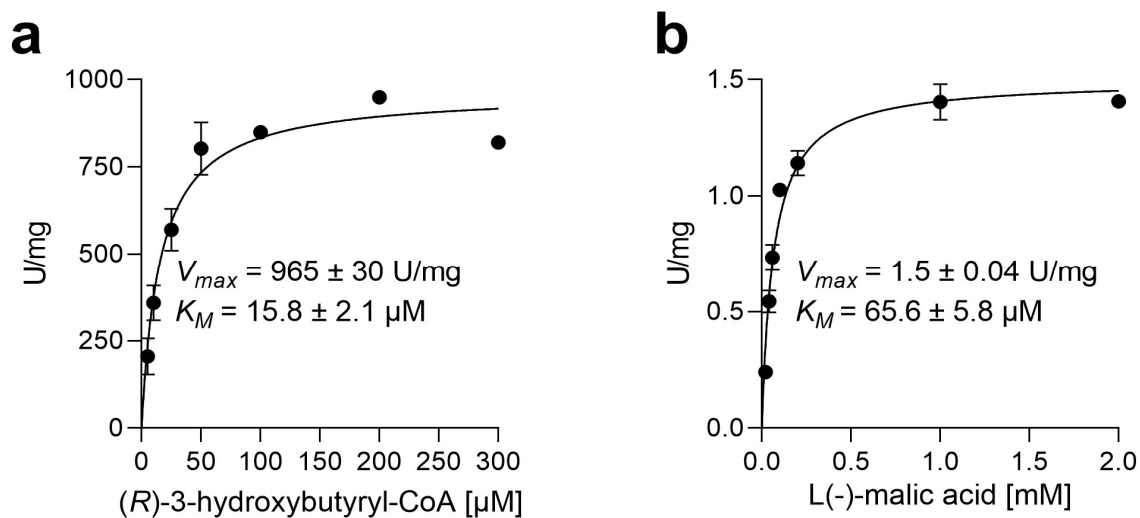

**Supplementary Fig. 2. Michaelis-Menten Plots and kinetic parameters for Bbd (a) and Mtk (b).** All displayed data points were measured in technical triplicates and are displayed as mean  $\pm$  SD.

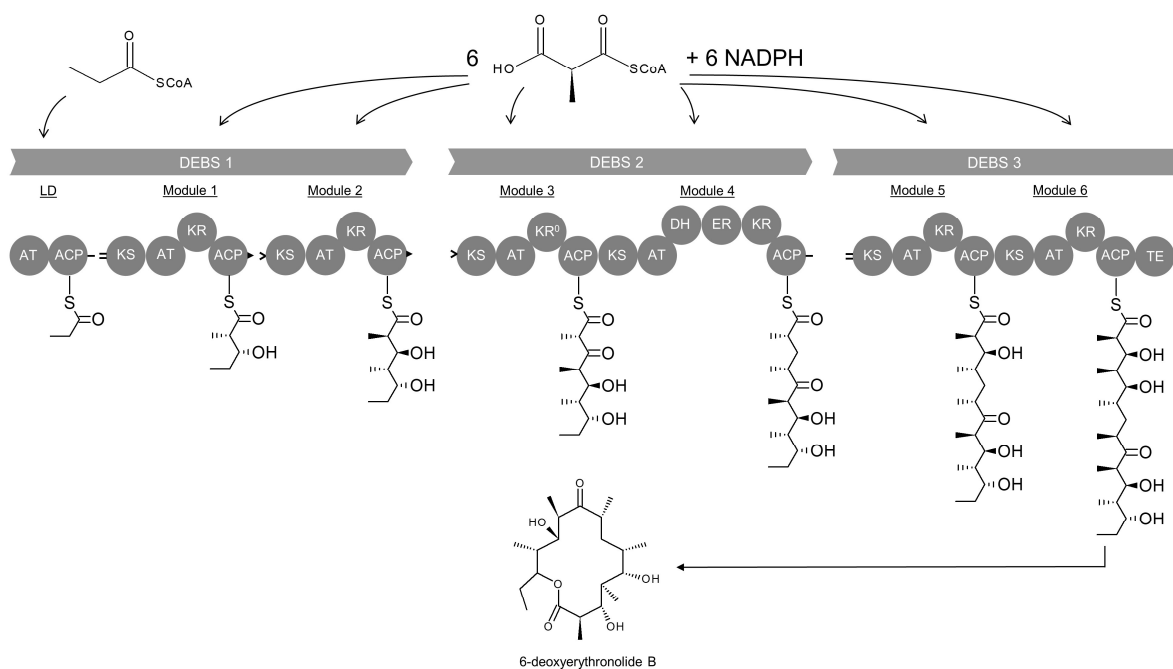

**Supplementary Fig. 3. 6-deoxyerythronolide B synthase (DEBS).** Displayed are the genetic architecture (DEBS 1-3), as well as the *in vitro* assembly line used in this assay. DEBS 1 was dissected into lone standing loading domain (LD), module 1 and module 2 which were connected through linker domains, as described before<sup>11</sup>. Each molecule 6-dEB is derived from one molecule propionyl-CoA and six molecules (2S)-methylmalonyl-CoA, under the consumption of six reducing equivalents NADPH.

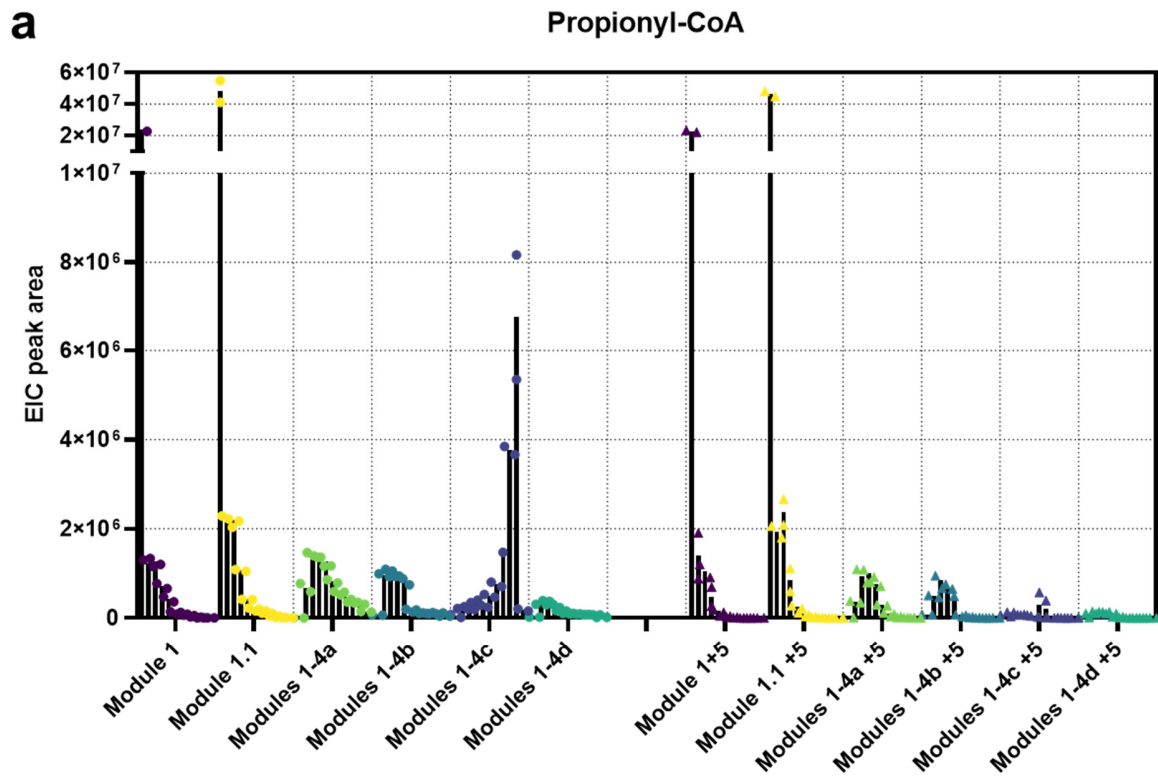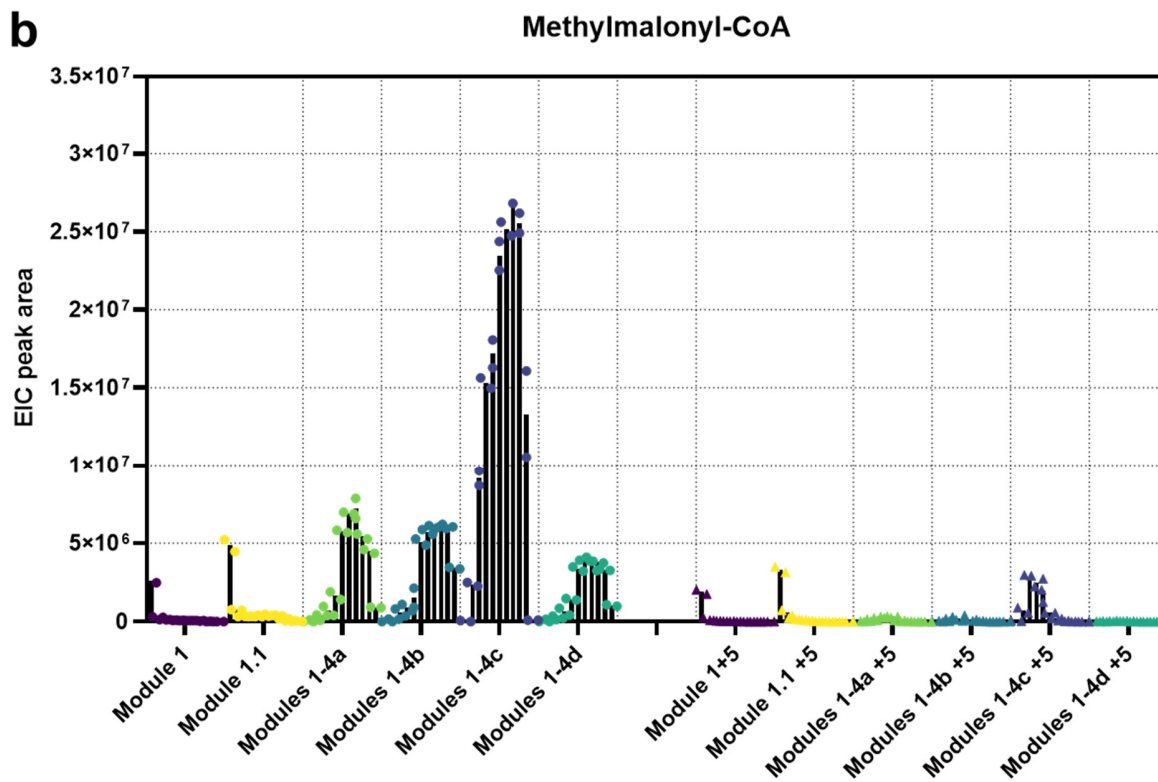

**C****Succinyl-CoA**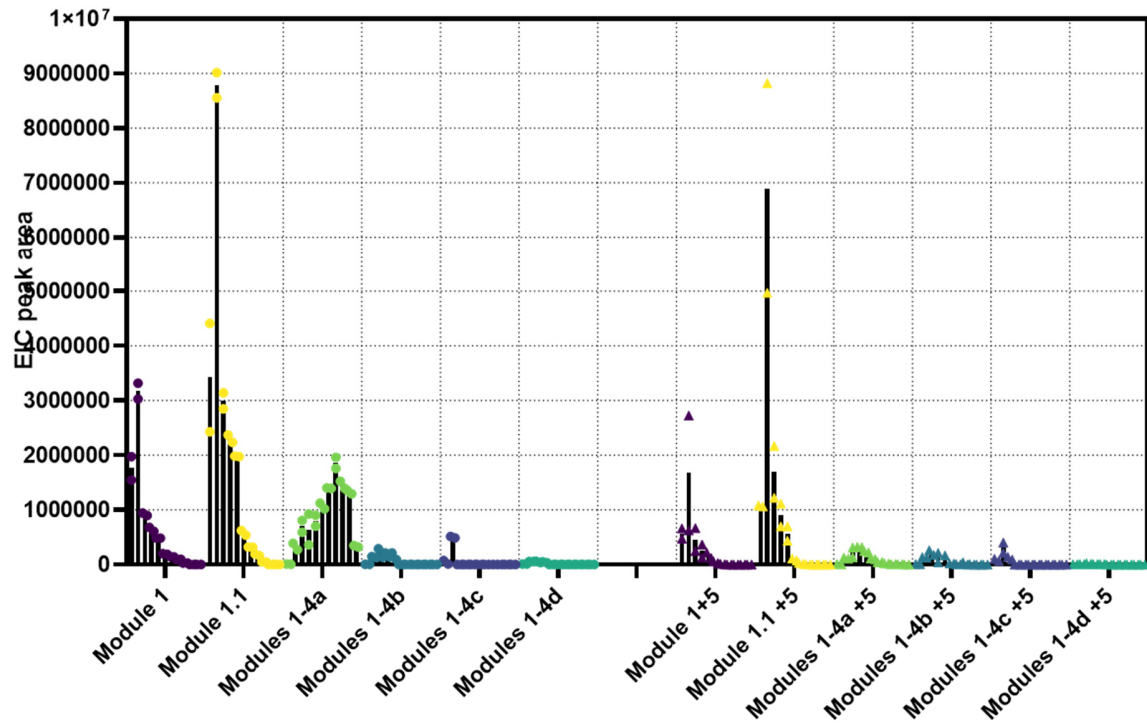**d** **$\gamma$ -hydroxybutyryl-CoA**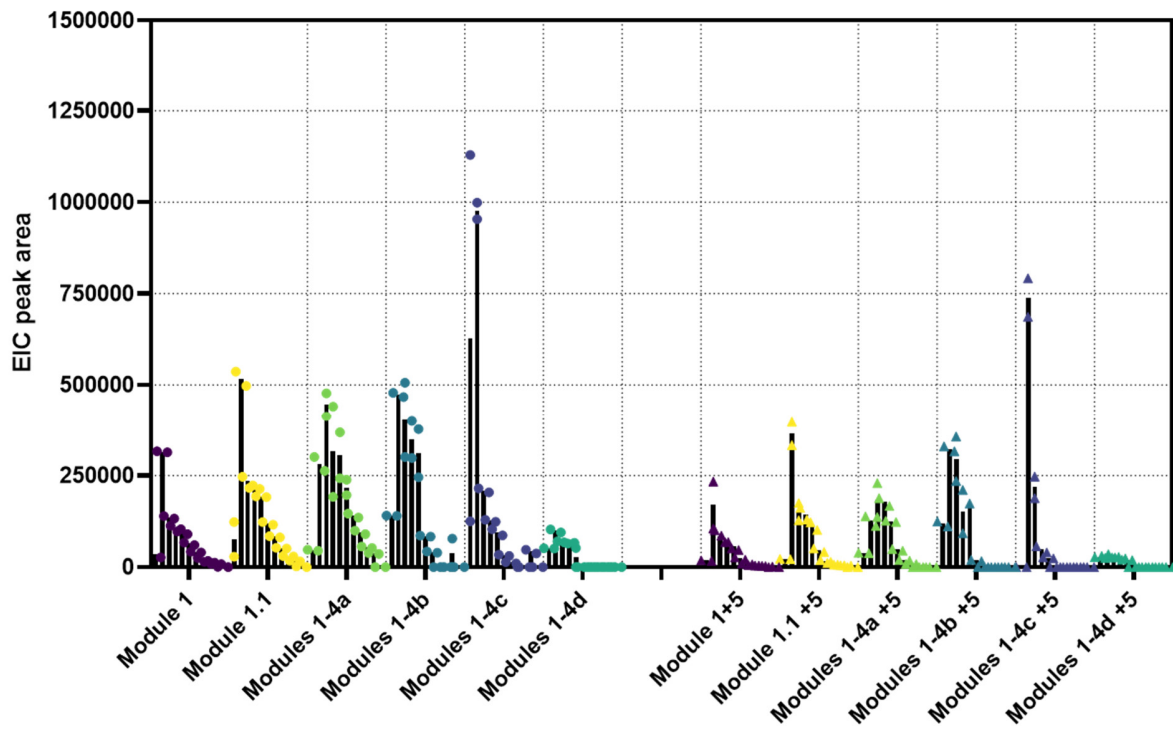

**e****Crotonyl-CoA**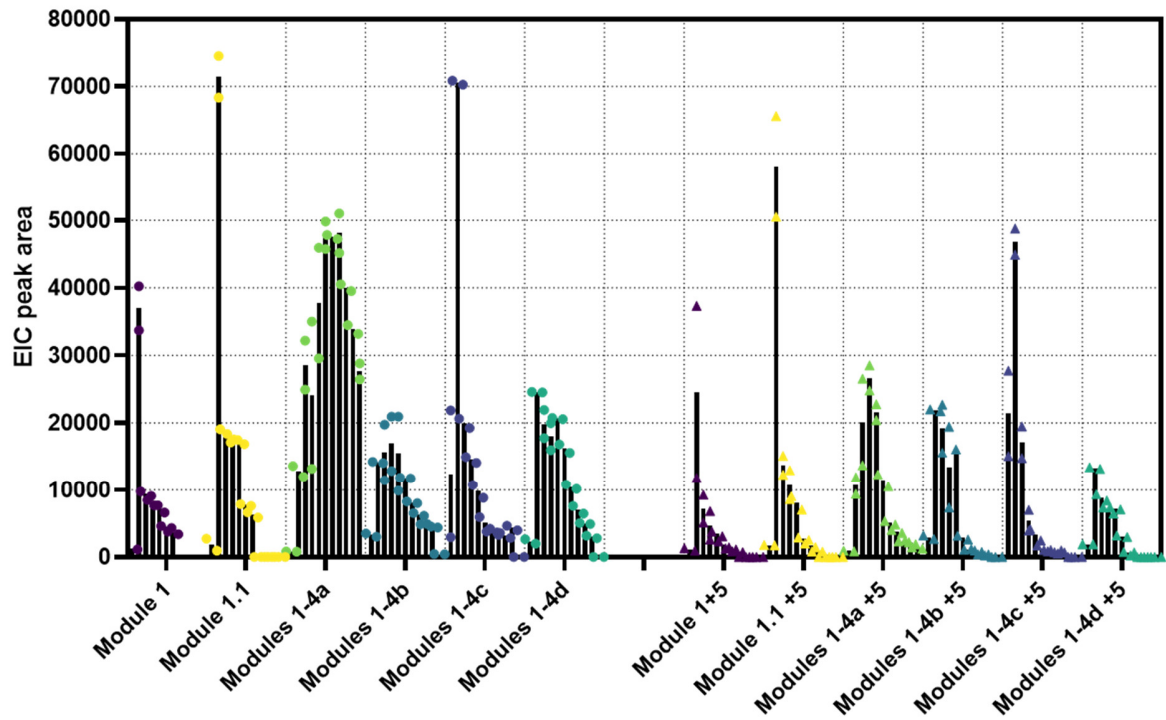**f****Ethylmalonyl-CoA**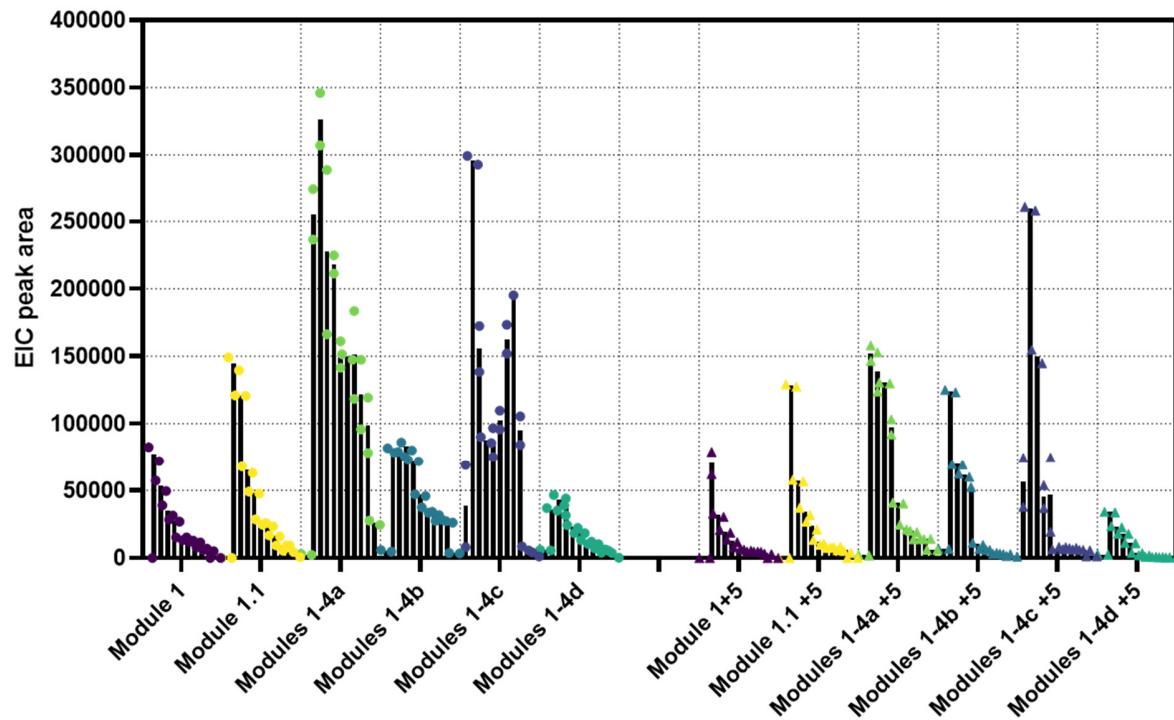

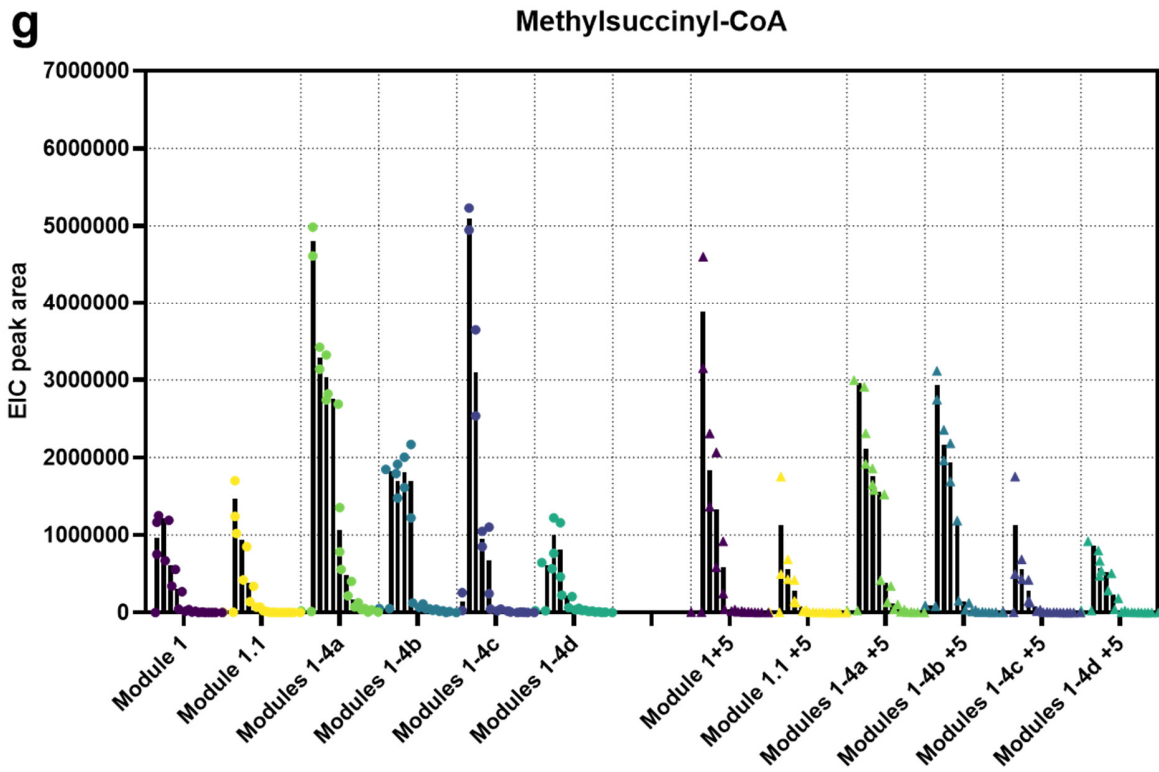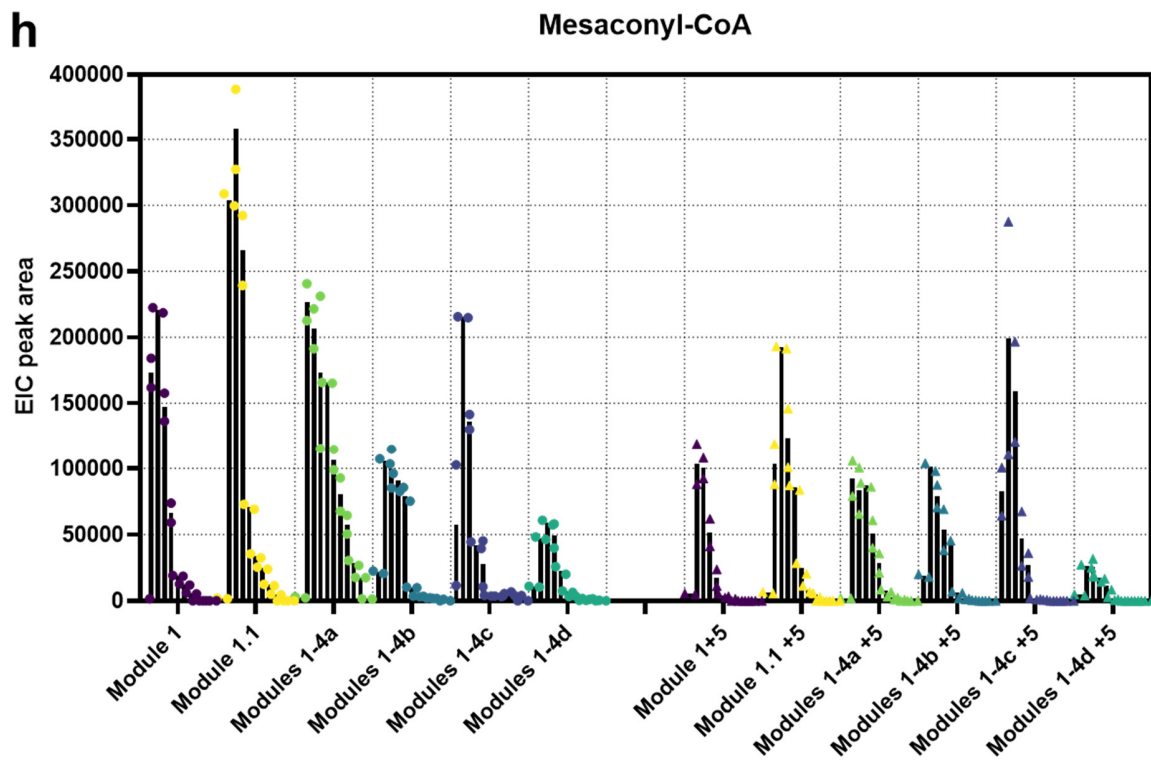

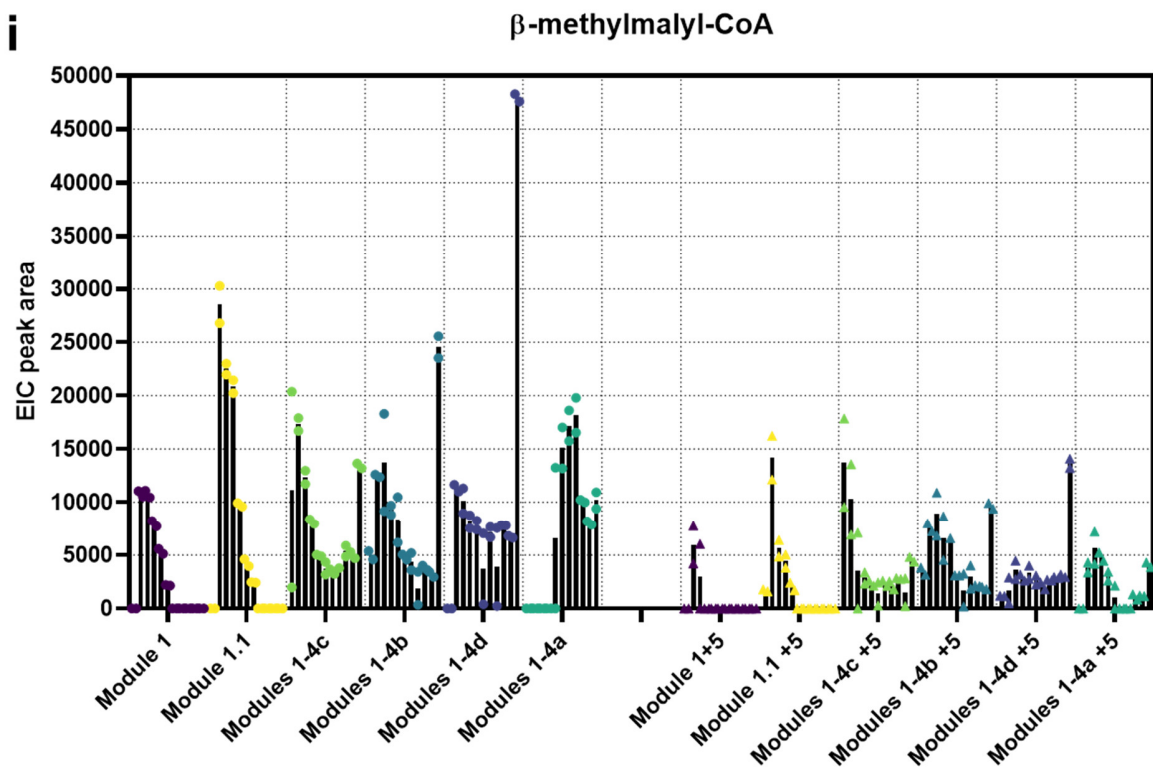

**Supplementary Fig. 4. Extracted Ion Counts (EIC) peak areas of CoA intermediates of module 1.** All shown values are the peak areas of the EICs of the quantifiers (see Table S5). The vertical lines separate the different assays as labelled on the x-axis. The bars represent the timepoints 0, 0.5, 1, 1.5, 2, 4, 6, 8, 10, 12 and 24 h (from left to right) in each assay. **a** Propionyl-CoA, **b** Methylmalonyl-CoA, **c** Succinyl-CoA, **d**  $\gamma$ -hydroxybutyryl-CoA, **e** Crotonyl-CoA, **f** Ethylmalonyl-CoA, **g** Methylsuccinyl-CoA, **h** Mesoconyl-CoA, **i**  $\beta$ -methylmalyl-CoA. The data was collected from two different experiments. The EICs of module 1, module 1.1, module 1+5 and module 1.1+5 were normalized by re-measuring samples from the initial dataset.



## References

1. Schwander, T., Schada von Borzyskowski, L., Burgener, S., Cortina, N.S. & Erb, T.J. A synthetic pathway for the fixation of carbon dioxide in vitro. *Science* **354**, 900-904 (2016).
2. von Borzyskowski, L.S. et al. Marine Proteobacteria metabolize glycolate via the  $\beta$ -hydroxyaspartate cycle. *Nature* **575**, 500-504 (2019).
3. Sundaram, S. et al. A modular in vitro platform for the production of terpenes and polyketides from CO<sub>2</sub>. *Angewandte Chemie International Edition* (2021).
4. Kitagawa, M. et al. Complete set of ORF clones of Escherichia coli ASKA library (a complete set of E. coli K-12 ORF archive): unique resources for biological research. *DNA Res* **12**, 291-9 (2005).
5. Mracek, J., Snyder, S.J., Chavez, U.B. & Turrens, J.F. A soluble fumarate reductase in Trypanosoma brucei procyclic trypomastigotes. *J Protozool* **38**, 554-8 (1991).
6. Schwander, T. The design and realization of synthetic pathways for the fixation of carbon dioxide in vitro, Philipps-Universität Marburg (2018).
7. Hugler, M., Menendez, C., Schagger, H. & Fuchs, G. Malonyl-coenzyme A reductase from Chloroflexus aurantiacus, a key enzyme of the 3-hydroxypropionate cycle for autotrophic CO<sub>2</sub> fixation. *J Bacteriol* **184**, 2404-10 (2002).
8. Bernhardsgrütter, I. et al. The multicatalytic compartment of propionyl-CoA synthase sequesters a toxic metabolite. *Nature chemical biology* **14**, 1127-1132 (2018).
9. Opgenorth, P.H., Korman, T.P. & Bowie, J.U. A synthetic biochemistry molecular purge valve module that maintains redox balance. *Nat Commun* **5**, 4113 (2014).
10. Egloff, K. Engineering of an artificial autotrophic CO<sub>2</sub> fixation pathway in Methylobacterium extorquens. (Philipps-Universität Marburg, 2014).
11. Lowry, B. et al. In vitro reconstitution and analysis of the 6-deoxyerythronolide B synthase. *Journal of the American Chemical Society* **135**, 16809-16812 (2013).
12. Erb, T.J., Retey, J., Fuchs, G. & Alber, B.E. Ethylmalonyl-CoA mutase from Rhodobacter sphaeroides defines a new subclade of coenzyme B<sub>12</sub>-dependent acyl-CoA mutases. *J Biol Chem* **283**, 32283-93 (2008).
13. Erb, T.J. The Ethylmalonyl-CoA Pathway, University of Freiburg (2009).
14. Söhling, B. & Gottschalk, G. Purification and characterization of a coenzyme-A-dependent succinate-semialdehyde dehydrogenase from Clostridium kluyveri. *Eur. J. Biochem.* **212**, 121-127 (1993).
15. Konneke, M. et al. Ammonia-oxidizing archaea use the most energy-efficient aerobic pathway for CO<sub>2</sub> fixation. *Proc Natl Acad Sci U S A* **111**, 8239-44 (2014).
16. Zarzycki, J. et al. Mesoconyl-coenzyme A hydratase, a new enzyme of two central carbon metabolic pathways in bacteria. *J Bacteriol* **190**, 1366-74 (2008).
17. Erb, T.J., Frerichs-Revermann, L., Fuchs, G. & Alber, B.E. The apparent malate synthase activity of Rhodobacter sphaeroides is due to two paralogous enzymes, (3S)-Methyl-coenzyme A (CoA)-methylmalyl-CoA lyase and (3S)-Methyl-CoA thioesterase. *J Bacteriol* **192**, 1249-58 (2010).
18. Sevinc, M.S., Ens, W. & Loewen, P.C. The cysteines of catalase HPII of Escherichia coli, including Cys438 which is blocked, do not have a catalytic role. *Eur J Biochem* **230**, 127-32 (1995).
19. Hoelsch, K., Suhrer, I., Heusel, M. & Weuster-Botz, D. Engineering of formate dehydrogenase: synergistic effect of mutations affecting cofactor specificity and chemical stability. *Appl Microbiol Biotechnol* **97**, 2473-81 (2013).



20. Nocek, B. et al. Polyphosphate-dependent synthesis of ATP and ADP by the family-2 polyphosphate kinases in bacteria. *Proceedings of the National Academy of Sciences* **105**, 17730-17735 (2008).
21. Scheffen, M. et al. A new-to-nature carboxylation module to improve natural and synthetic CO<sub>2</sub> fixation. *Nature Catalysis* **4**, 105-115 (2021).
22. Schada von Borzyskowski, L. et al. Marine Proteobacteria metabolize glycolate via the beta-hydroxyaspartate cycle. *Nature* **575**, 500-504 (2019).
23. Rommel, T.O., Hund, H.K., Speth, A.R. & Lingens, F. Purification and N-terminal amino-acid sequences of bacterial malate dehydrogenases from six actinomycetales strains and from *Phenylobacterium immobile*, strain E. *Biol Chem Hoppe Seyler* **370**, 763-8 (1989).
24. Ueda, Y., Yumoto, N., Tokushige, M., Fukui, K. & Ohya-Nishiguchi, H. Purification and characterization of two types of fumarase from *Escherichia coli*. *J Biochem* **109**, 728-33 (1991).
25. Nolte, J.C. et al. Novel characteristics of succinate coenzyme A (Succinate-CoA) ligases: conversion of malate to malyl-CoA and CoA-thioester formation of succinate analogues in vitro. *Appl Environ Microbiol* **80**, 166-76 (2014).
26. Ito, S., Koyama, N. & Osanai, T. Citrate synthase from *Synechocystis* is a distinct class of bacterial citrate synthase. *Sci Rep* **9**, 6038 (2019).
27. Jordan, P.A., Tang, Y., Bradbury, A.J., Thomson, A.J. & Guest, J.R. Biochemical and spectroscopic characterization of *Escherichia coli* aconitases (AcnA and AcnB). *Biochem J* **344 Pt 3**, 739-46 (1999).
28. MacKintosh, C. & Nimmo, H.G. Purification and regulatory properties of isocitrate lyase from *Escherichia coli* ML308. *Biochem J* **250**, 25-31 (1988).
29. Schwander, T. The design and realization of synthetic pathways for the fixation of carbon dioxide in vitro, Philipps University Marburg (2017).
30. Bernhardsgrutter, I. et al. The multicyclic compartment of propionyl-CoA synthase sequesters a toxic metabolite. *Nat Chem Biol* **14**, 1127-1132 (2018).
31. Saint Girons, I. et al. Structural and catalytic characteristics of *Escherichia coli* adenylate kinase. *J Biol Chem* **262**, 622-9 (1987).
32. Oeding, V. & Schlegel, H.G. Beta-ketothiolase from *Hydrogenomonas eutropha* H16 and its significance in the regulation of poly-beta-hydroxybutyrate metabolism. *Biochem J* **134**, 239-48 (1973).
33. Liu, Q., Ouyang, S.P., Chung, A., Wu, Q. & Chen, G.Q. Microbial production of R-3-hydroxybutyric acid by recombinant *E. coli* harboring genes of *phbA*, *phbB*, and *tesB*. *Appl Microbiol Biotechnol* **76**, 811-8 (2007).
34. Flamholz, A., Noor, E., Bar-Even, A. & Milo, R. eQuilibrator—the biochemical thermodynamics calculator. *Nucleic acids research* **40**, D770-D775 (2012).
